# Supplementary material for: Application of SVR-Mediated GWAS for Identification of Durable Genetic Regions Associated with Soybean Seed Quality Traits
Source: MDPI journal article supplement (doi:10.3390/plants12142659), 2023-07-16
Supplement: s1 [file s1]

**Table S1.** The full list of detected MTAs for seed protein using FarmCPU in the tested soybean population.

| Chromosome | SNP position | Effect  | Standard error |
|------------|--------------|---------|----------------|
| 3          | 15234716     | -0.4359 | 0.11447        |
| 3          | 15234726     | -0.4410 | 0.11548        |
| 15         | 7193889      | 0.6491  | 0.17382        |
| 15         | 7733816      | 0.7211  | 0.15725        |
| 15         | 7756557      | 0.6729  | 0.16671        |
| 15         | 7756572      | 0.6729  | 0.16671        |
| 15         | 7756641      | 0.7039  | 0.17017        |
| 15         | 7756662      | 0.7039  | 0.17017        |
| 15         | 7822658      | 0.5335  | 0.13837        |
| 15         | 7891365      | 0.7218  | 0.17185        |
| 15         | 7995655      | 0.6484  | 0.16515        |
| 15         | 8453911      | 0.7403  | 0.16148        |
| 15         | 8453979      | 0.6972  | 0.15861        |
| 15         | 8453988      | 0.8256  | 0.17338        |
| 15         | 8513793      | 0.7031  | 0.15797        |

FarmCPU: Fixed and random model circulating probability unification.

**Table S2.** The full list of detected MTAs for seed protein using SVR in the tested soybean population.

| Chromosome | SNP position | Effect (Scaled) |
|------------|--------------|-----------------|
| 1          | 50230454     | 71.92           |
| 1          | 50572171     | 74.33           |
| 1          | 50961340     | 74.90           |
| 1          | 51408405     | 80.65           |
| 1          | 51516560     | 76.34           |
| 1          | 51517034     | 75.62           |
| 1          | 51589860     | 83.10           |
| 1          | 51628579     | 74.62           |
| 1          | 51630871     | 75.98           |
| 1          | 51764985     | 72.28           |
| 1          | 51765084     | 73.54           |
| 1          | 51814345     | 78.86           |
| 1          | 51814474     | 84.16           |
| 5          | 31316535     | 80.73           |
| 5          | 35419945     | 88.20           |
| 5          | 35422388     | 90.50           |
| 5          | 37399766     | 71.80           |
| 6          | 47513336     | 74.57           |
| 12         | 33249488     | 86.41           |
| 12         | 33457196     | 86.41           |
| 12         | 33521414     | 87.10           |
| 14         | 3334156      | 73.81           |
| 14         | 3346285      | 85.68           |
| 14         | 9487231      | 92.58           |
| 15         | 5606405      | 75.33           |
| 16         | 28926313     | 74.98           |
| 16         | 8197092      | 75.84           |

SVR: Support Vector Regression.

**Table S3.** The full list of detected MTAs for seed oil using FarmCPU in the tested soybean population.

| Chromosome | SNP position | Effect  | Standard error |
|------------|--------------|---------|----------------|
| 7          | 35743521     | -0.2207 | 0.05870        |
| 8          | 18403233     | -0.2627 | 0.06924        |
| 13         | 21486008     | -0.4791 | 0.11468        |
| 13         | 27107431     | 0.2610  | 0.06902        |
| 13         | 27256136     | 0.2578  | 0.06893        |
| 13         | 32907711     | 0.2163  | 0.05782        |
| 15         | 7733816      | -0.3556 | 0.09303        |
| 15         | 8453911      | -0.3592 | 0.09563        |
| 15         | 8453988      | -0.3933 | 0.10292        |
| 19         | 40498656     | 0.4538  | 0.11772        |

FarmCPU: Fixed and random model circulating probability unification.

**Table S4.** The full list of detected MTAs for seed oil using SVR in the tested soybean population.

| Chromosome | SNP position | Effect (Scaled) |
|------------|--------------|-----------------|
| 3          | 12843941     | 76.39           |
| 3          | 12882802     | 82.66           |
| 3          | 12967720     | 77.26           |
| 12         | 1816355      | 81.94           |
| 12         | 33249488     | 80.30           |
| 12         | 33457196     | 80.30           |
| 13         | 29958610     | 79.81           |
| 14         | 3346285      | 77.52           |
| 15         | 21518830     | 92.25           |
| 15         | 41559690     | 95.28           |
| 15         | 44633341     | 76.21           |
| 15         | 49106487     | 80.06           |
| 16         | 28926313     | 88.83           |

SVR: Support Vector Regression.

**Table S5.** The full list of detected MTAs for seed oil using FarmCPU in the tested soybean population.

| Chromosome | SNP position | Effect | Standard error |
|------------|--------------|--------|----------------|
| 10         | 10650787     | 0.4522 | 0.12225        |
| 10         | 10689110     | 0.4601 | 0.12322        |
| 18         | 812340       | 0.6335 | 0.14888        |

FarmCPU: Fixed and random model circulating probability unification.

**Table S6.** The full list of detected MTAs for 100 seed-weight using SVR in the tested soybean population.

| Chromosome | SNP position | Effect (Scaled) |
|------------|--------------|-----------------|
| 2          | 11159017     | 91.25           |
| 2          | 42949884     | 82.66           |
| 3          | 15293395     | 82.66           |
| 3          | 16429719     | 82.66           |
| 3          | 19258162     | 82.66           |
| 3          | 39075894     | 84.39           |
| 4          | 49895660     | 85.64           |
| 4          | 49954584     | 85.64           |
| 9          | 42241635     | 82.66           |
| 11         | 4712550      | 82.66           |
| 14         | 9782202      | 82.66           |
| 15         | 36291394     | 82.66           |
| 15         | 36291484     | 82.66           |
| 15         | 36454863     | 86.39           |
| 16         | 33116501     | 82.66           |
| 16         | 37051444     | 82.66           |
| 16         | 37187094     | 82.66           |
| 16         | 37306568     | 82.66           |
| 16         | 37375421     | 82.66           |
| 19         | 47350982     | 82.66           |
| 20         | 266113       | 82.66           |
| 20         | 26567270     | 82.66           |

SVR: Support Vector Regression.
